# Supplementary material for: Comparative assessment of nutritional, thermal, rheological and functional properties of nine Australian lupin cultivars
Source: PubMed Central journal article supplement (PMC8564527; doi:10.1038/s41598-021-00838-x), 2021-11-02
Supplement: 41598_2021_838_MOESM1_ESM.pdf [file 41598_2021_838_MOESM1_ESM.pdf]

# Comparative assessment of nutritional, thermal, rheological and functional properties of nine Australian lupin cultivars

**Kishor Mazumder<sup>1,2,\*</sup>, Biswajit Biswas<sup>1</sup>, Philip G Kerr<sup>2,\*</sup>, Christopher Blanchard<sup>2</sup>, Afia Nabila<sup>3</sup>, Mimi Golder<sup>4</sup>, Mohammad Gulzarul Aziz<sup>5</sup> & Asgar Farahnaky<sup>2,6</sup>**

<sup>1</sup> Department of Pharmacy, Faculty of Biological Science and Technology, Jashore University of Science and Technology, Jashore - 7408, Bangladesh

<sup>2</sup> School of Biomedical Sciences, Charles Sturt University, Wagga Wagga, New South Wales - 2650, Australia

<sup>3</sup> Department of Pharmacy, University of Science and Technology Chittagong, Chittagong - 4202, Bangladesh

<sup>4</sup> Pharmacy Discipline, Life Science School, Khulna University, Khulna - 9208, Bangladesh

<sup>5</sup> Department of Food Technology and Rural Industries, Bangladesh Agricultural University, Mymensingh - 2202, Bangladesh

<sup>6</sup> Biosciences and Food Technology, School of Science, RMIT University, Melbourne - 3083, Australia

\*Correspondence to: kmazumder@just.edu.bd, pkerr@csu.edu.au

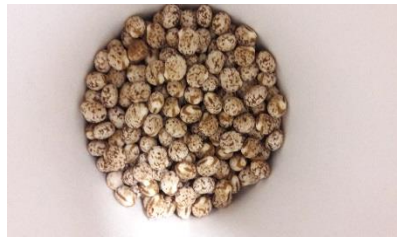

Barlock

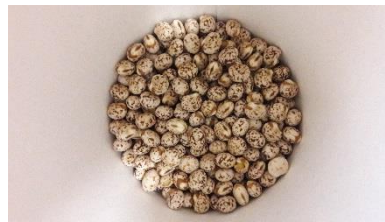

Gunyidi

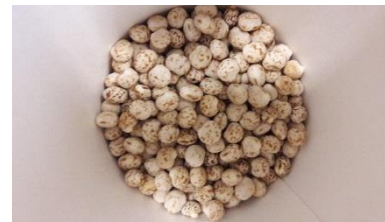

Jenabillup

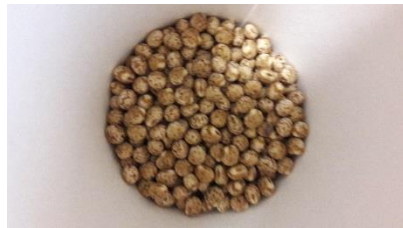

Jindalee

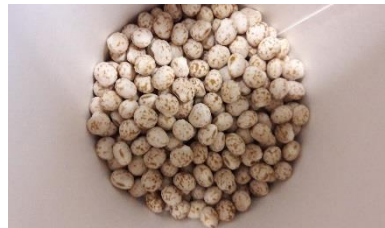

Jurien

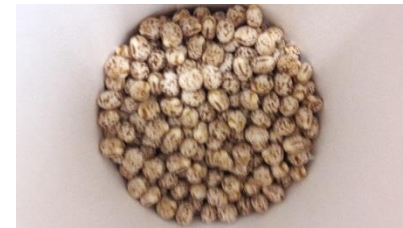

Mandelup

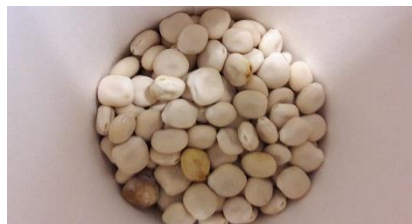

Luxor

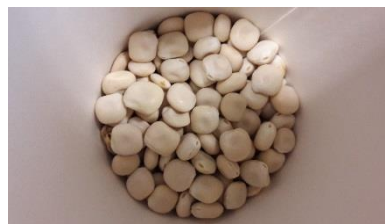

Rosetta

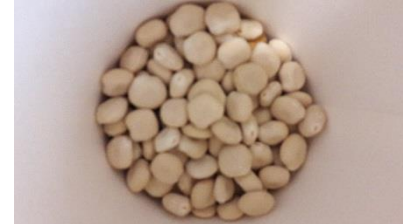

WK388

**Supplementary Figure S1. Nine Australian lupin cultivars used in the present work**

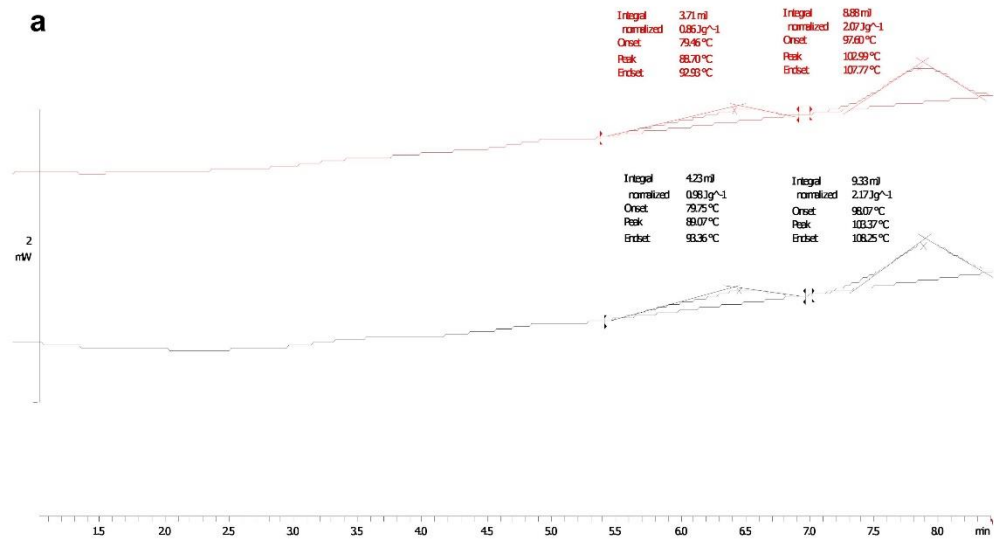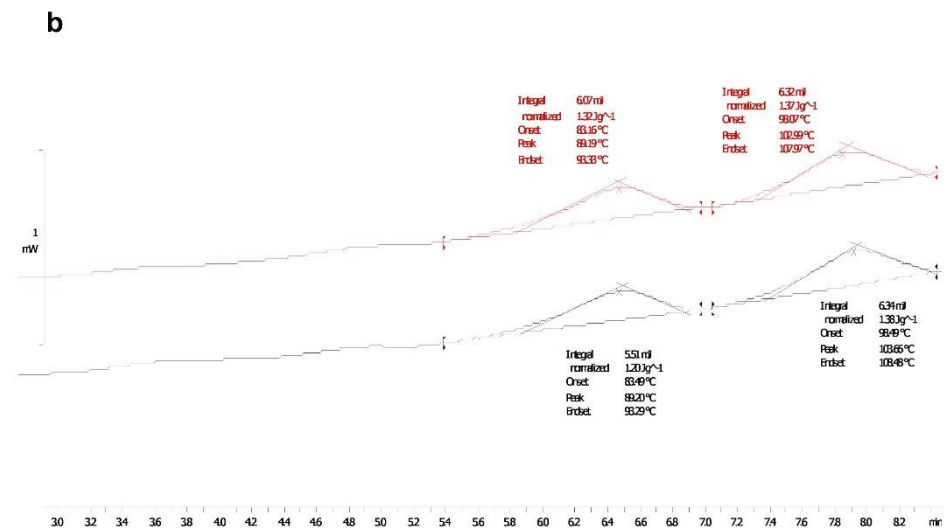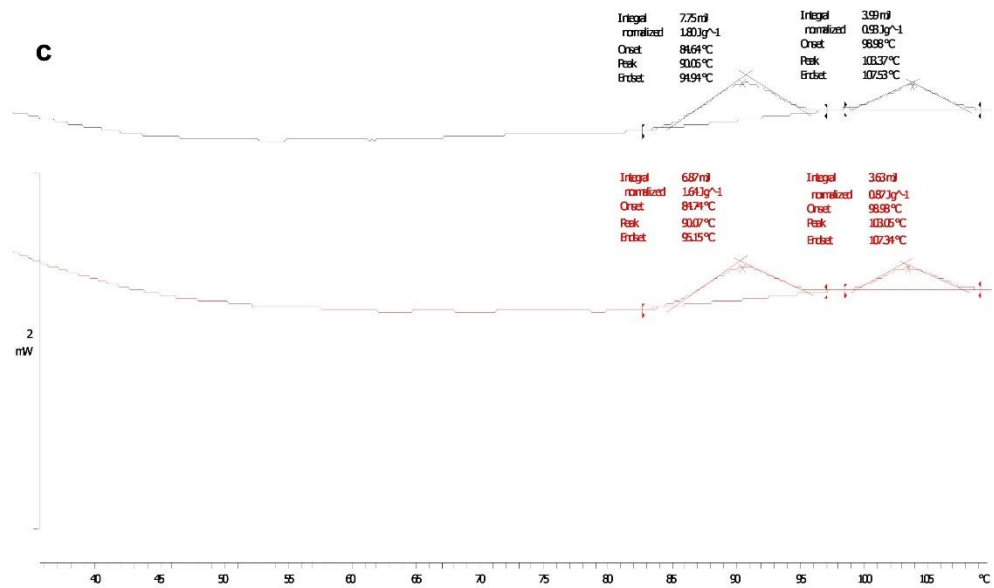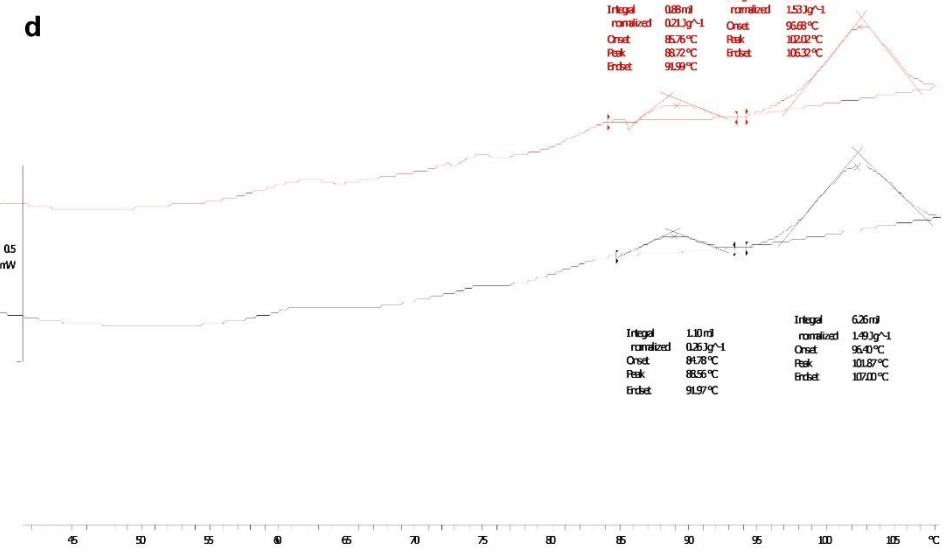

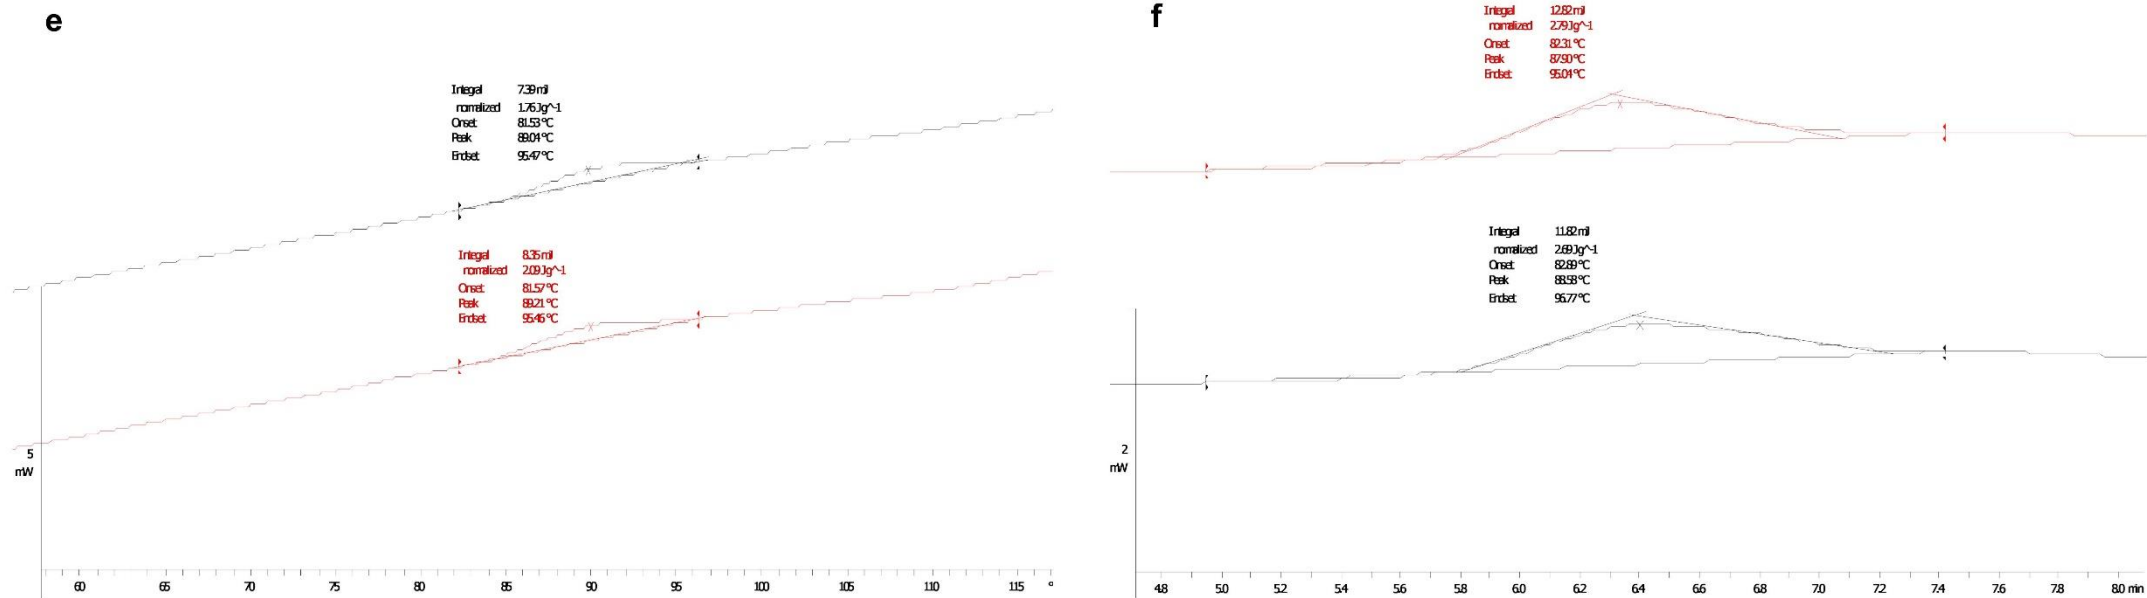

**Supplementary Figure S2.** Thermograms of proteins of some lupin flours; where, **a:** Gunyidi, **b:** Jenabillup, **c:** Jindalee, **d:** Mandelup, **e:** Luxor, **f:** Rosetta. The two peaks in the DSC thermogram indicate the presence of two major protein classes: peak 1 represents the vicilins ( $\beta$ -conglutin) and peak 2 represents the legumins ( $\alpha$ -conglutin). The red lines represent DSC thermograms of protein isolates while the black lines represent the thermograms of lupin flours.

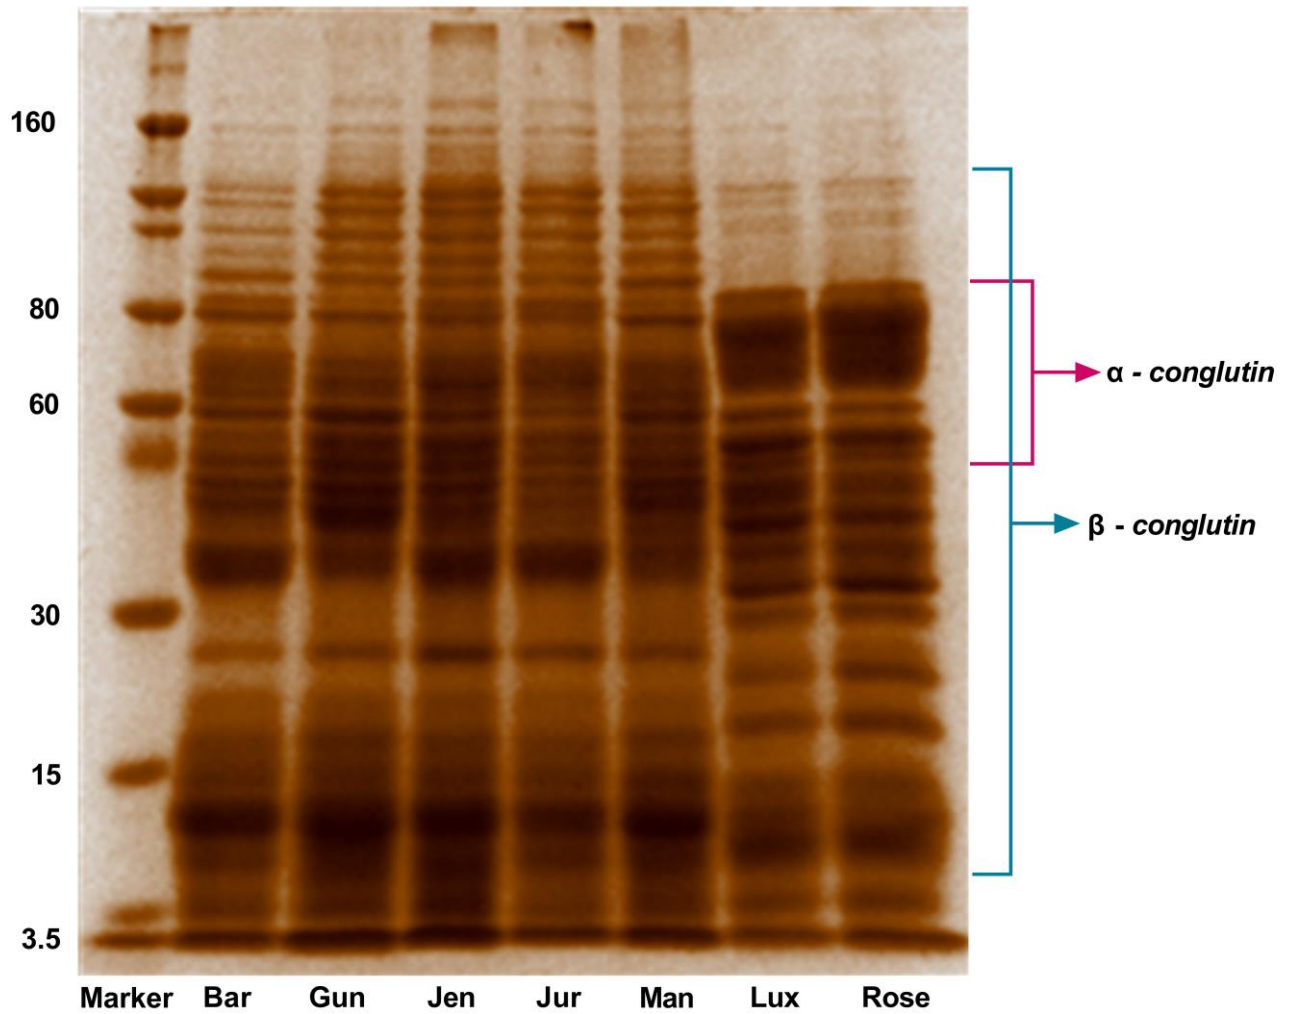

**Supplementary Figure S3.** Electrophoretic pattern of major protein isolates ( $\beta$ -,  $\alpha$ - and  $\gamma$ -conglutin) of lupin cultivars, separated by SDS-PAGE analysis. Here, Bar is Barlock, Gun is Gunyidi, Jen is Jenabillup, Jur is Jurien, Man is Mandelup, Lux is Luxor and Rose is Rosetta.

| <b>Lupin Cultivars</b> | <b>Initial Weight (gm)</b> | <b>Kernal Weight (gm)</b> | <b>%</b> | <b>Seed Coat Weight (gm)</b> | <b>%</b> | <b>Intermediate (gm)</b> | <b>%</b> |
|------------------------|----------------------------|---------------------------|----------|------------------------------|----------|--------------------------|----------|
| <b>Barlock</b>         | 533.8                      | 362.1                     | 67.83    | 126                          | 23.60    | 45.7                     | 8.56     |
| <b>Gunyidi</b>         | 524                        | 353.3                     | 67.42    | 129.4                        | 24.69    | 41.3                     | 7.88     |
| <b>Jenabillup</b>      | 504                        | 345.8                     | 68.61    | 115.06                       | 22.83    | 43.16                    | 8.56     |
| <b>Jindalee</b>        | 525.4                      | 360.0                     | 68.52    | 121.3                        | 23.09    | 44.1                     | 8.39     |
| <b>Jurin</b>           | 509.7                      | 354.7                     | 69.59    | 116.9                        | 22.94    | 38.1                     | 7.47     |
| <b>Mandelup</b>        | 519.9                      | 354.3                     | 68.15    | 123.6                        | 23.77    | 42                       | 8.08     |
| <b>Luxor</b>           | 510                        | 364.1                     | 71.39    | 83.9                         | 16.45    | 62                       | 12.16    |
| <b>Rosetta</b>         | 508.8                      | 374.6                     | 73.62    | 78.4                         | 15.41    | 55.8                     | 10.97    |
| <b>WK388</b>           | 514.5                      | 368.4                     | 71.60    | 78                           | 15.16    | 68.1                     | 13.24    |

**Supplementary Table S1.** Kernel and seed coat contents of different cultivars obtained after dehulling of lupin seeds.

| Cultivars         | Peak 1 (mPa-s)                   | Peak 2 (mPa-s)                  | Trough (mPa-s)               | Peak 3 (mPa-s)            | Peak 1 Time (sec)            | Peak 2 Time (sec) | Peak 3 Time (sec) | Final Viscosity (mPa-s)     |
|-------------------|----------------------------------|---------------------------------|------------------------------|---------------------------|------------------------------|-------------------|-------------------|-----------------------------|
| <b>Barlock</b>    | 588.5 ± 3.54<br>c,f,g,h,i        | 578.5 ± 37.48<br>b,c,d,g,h,i    | 512 ± 8.49 <sup>c,i</sup>    |                           | 9.65 ± 0.03 <sup>g,h,i</sup> | 12.25 ± 0.04      |                   | 1405 ± 22.63 <sup>d</sup>   |
| <b>Gunyidi</b>    | 590 ± 4.24 <sup>c,f,g,h,i</sup>  | 464.5 ± 13.44<br>a,g,h,i        | 411 ± 8.49                   |                           | 9.69 ± 0.02 <sup>g,h,i</sup> | 11.83 ± 0.84      |                   | 1190 ± 19.80                |
| <b>Jenabillup</b> | 506.5 ± 11.32<br>a,b,d,e,f,g,h,i | 379.5 ± 4.95<br>a,f,g,h,i       | 352.5 ± 3.54 <sup>a</sup>    | 316.2 ± 0.23 <sup>e</sup> | 9.9 ± 0.14 <sup>g,h,i</sup>  | 12.2 ± 0.07       | 16.2 ± 0.23       | 1028 ± 31.11 <sup>g</sup>   |
| <b>Jindalee</b>   | 586.5 ± 10.61<br>c,f,g,h,i       | 427 ± 9.9 <sup>a,g,h,i</sup>    | 403.5 ± 7.78                 |                           | 9.54 ± 0.04 <sup>g,h,i</sup> | 11.54 ± 0.05      |                   | 863 ± 19.8 <sup>a,g</sup>   |
| <b>Jurien</b>     | 561.5 ± 34.64<br>c,f,g,h,i       | 477 ± 18.38 <sup>g,h,i</sup>    | 438 ± 15.56                  | 426.03 ± 0.0 <sup>c</sup> | 9.72 ± 0.16 <sup>g,h,i</sup> | 12.38 ± 0.0       | 16.0 ± 0.0        | 1090.5 ± 34.65              |
| <b>Mandelup</b>   | 688 ± 7.07<br>a,b,c,d,e,g,h,i    | 521 ± 19.8 <sup>c,g,h,i</sup>   | 446.5 ± 41.72 <sup>h</sup>   |                           | 9.92 ± 0.07 <sup>g,h,i</sup> | 12.59 ± 0.12      |                   | 1251.5 ± 40.31              |
| <b>Luxor</b>      | 175 ± 0.0<br>a,b,c,d,e,f,h,i     | 1036 ± 32.53<br>a,b,c,d,e,f,h,i | 414 ± 31.11                  |                           | 4.95 ± 0.07<br>a,b,c,d,e,f   | 12.12 ± 0.05      |                   | 1593 ± 347.9 <sup>c,d</sup> |
| <b>Rosetta</b>    | 122.5 ± 0.71<br>a,b,c,d,e,f,g,i  | 900 ± 41.01<br>a,b,c,d,e,f,g    | 327.5 ± 61.52 <sup>a,f</sup> |                           | 4.92 ± 0.16<br>a,b,c,d,e,f   | 11.95 ± 0.04      |                   | 1138 ± 183.85               |
| <b>WK388</b>      | 147 ± 4.24<br>a,b,c,d,e,f,g,h    | 860 ± 41.01<br>a,b,c,d,e,f,g,h  | 390 ± 33.94 <sup>a</sup>     |                           | 4.85 ± 0.14<br>a,b,c,d,e,f   | 12.04 ± 0.02      |                   | 1078.5 ± 21.92              |

**Supplementary Table S2.** RVA profile of different lupin cultivars. Data are means of three replicates with standard deviations (SD). Data within the same column with different superscripts are significantly different, pair-wise comparison by Post Hoc Tukey test (<sup>a</sup> P < 0.05 vs. Barlock; <sup>b</sup> P < 0.05 vs. Gunyidi; <sup>c</sup> P < 0.05 vs Jenabillup; <sup>d</sup> P < 0.05 vs. Jindalee; <sup>e</sup> P < 0.05 vs Jurien; <sup>f</sup> P < 0.05 vs. Mandelup; <sup>g</sup> P < 0.05 vs Luxor; <sup>h</sup> P < 0.05 vs Rosetta; <sup>i</sup> P < 0.05 vs WK388).

| <b>Cultivars</b>  | <b>Hardness (g/mm)</b>                | <b>Work (g.mm)</b>                          | <b>Peak Force (g)</b>                     |
|-------------------|---------------------------------------|---------------------------------------------|-------------------------------------------|
| <b>Barlock</b>    | 34.17 ± 9.88 <sup>g,h</sup>           | 373.41 ± 18 <sup>b,c,d,e,f,g,h,i</sup>      | 376.92 ± 22.62 <sup>b,c,d,e,g,h,i</sup>   |
| <b>Gunyidi</b>    | 44.04 ± 0.4 <sup>h,i</sup>            | 2612.72 ± 80.65 <sup>a,c,d,e,f,g,h,i</sup>  | 442.04 ± 7.17 <sup>a,c,e,f,g,h,i</sup>    |
| <b>Jenabillup</b> | 32.36 ± 3.09 <sup>g,h</sup>           | 2195.45 ± 72 <sup>a,b,d,e,f,g,h,i</sup>     | 413.01 ± 80.73 <sup>a,b,e,f,g,i</sup>     |
| <b>Jindalee</b>   | 33.20 ± 44 <sup>g,h</sup>             | 2649.84 ± 25 <sup>a,b,c,e,f,g,h,i</sup>     | 425.56 ± 70.31 <sup>a,e,f,g,i</sup>       |
| <b>Jurin</b>      | 41.24 ± 6.31 <sup>g,i</sup>           | 2825.86 ± 323.66 <sup>a,b,c,d,f,g,h,i</sup> | 474.13 ± 87.99 <sup>a,b,c,d,f,g,h,i</sup> |
| <b>Mandelup</b>   | 30.08 ± 1.23 <sup>g,h</sup>           | 2950.11 ± 227.93 <sup>a,b,c,d,e,g,h,i</sup> | 374.16 ± 47.61 <sup>b,c,d,e,g,h,i</sup>   |
| <b>Luxor</b>      | 50.62 ± 11.72 <sup>a,c,d,f,i</sup>    | 3269.63 ± 286.47 <sup>a,b,c,d,e,f,h,i</sup> | 506.59 ± 46.70 <sup>a,b,c,d,e,f,h,i</sup> |
| <b>Rosetta</b>    | 63.68 ± 4.79 <sup>a,b,c,d,e,f,i</sup> | 2088.84 ± 42.46 <sup>a,b,c,d,e,f,g,i</sup>  | 407.01 ± 4.95 <sup>a,b,e,f,g,i</sup>      |
| <b>WK388</b>      | 26.71 ± 3.25 <sup>b,e,g,h</sup>       | 1321.62 ± 186.28 <sup>a,b,c,d,e,f,g,h</sup> | 220.12 ± 25.96 <sup>a,b,c,d,e,f,g,h</sup> |

**Supplementary Table S3.** Texture analysis of different lupin cultivars. Data are means of three replicates with standard deviations (SD). Data within the same column with different superscripts are significantly different, pair-wise comparison by Post Hoc Tukey test (<sup>a</sup> P < 0.05 vs. Barlock; <sup>b</sup> P < 0.05 vs. Gunyidi; <sup>c</sup> P < 0.05 vs Jenabillup; <sup>d</sup> P < 0.05 vs. Jindalee; <sup>e</sup> P < 0.05 vs Jurin; <sup>f</sup> P < 0.05 vs. Mandelup; <sup>g</sup> P < 0.05 vs Luxor; <sup>h</sup> P < 0.05 vs Rosetta; <sup>i</sup> P < 0.05 vs WK388).
